# Supplementary material for: Homogeneous nucleation of Li2O2under Li–O2battery discharge
Source: Royal Society of Chemistry journal article supplement (doi:10.1039/c9nr08493b), 2020-01-01
Supplement: c9nr08493b1.pdf [file c9nr08493b1.pdf]

## Homogeneous nucleation of $\text{Li}_2\text{O}_2$ under $\text{Li-O}_2$ battery discharge

Tatiana Zakharchenko,<sup>a,b</sup> Artem Sergeev,<sup>b</sup> Alexander Bashkirov,<sup>a</sup> Polina Neklyudova,<sup>c</sup> Antonio Cervellino,<sup>d</sup> Daniil Itkis,<sup>a,b</sup> Lada V. Yashina<sup>a,b,\*</sup>

a) N.N. Semenov Federal Research Center for Chemical Physics, Kosygina Street 4 Building 1, 119991 Moscow, Russia

b) Lomonosov Moscow State University, Leninskie gory 1/3, 119991 Moscow, Russia.

c) Institute of Nanotechnology of Microelectronics RAS, Nagatinskaya str., 16A/11, 115487 Moscow, Russia

d) Paul Scherrer Institute, Forschungsstrasse 111, 5232, Villigen, Switzerland

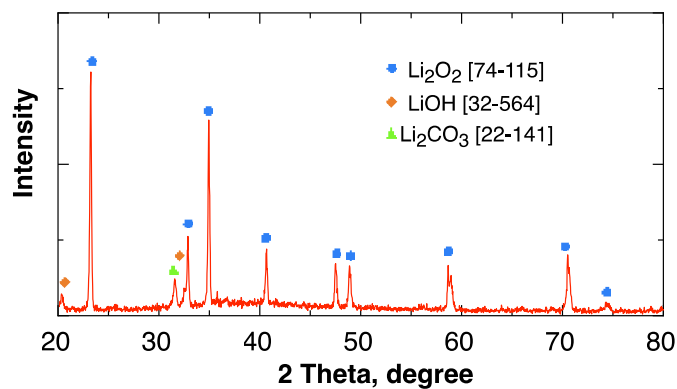

Figure S1. XRD pattern of synthesized  $\text{Li}_2\text{O}_2$ . Numbers in brackets according to PDF-2 database (ICDD).

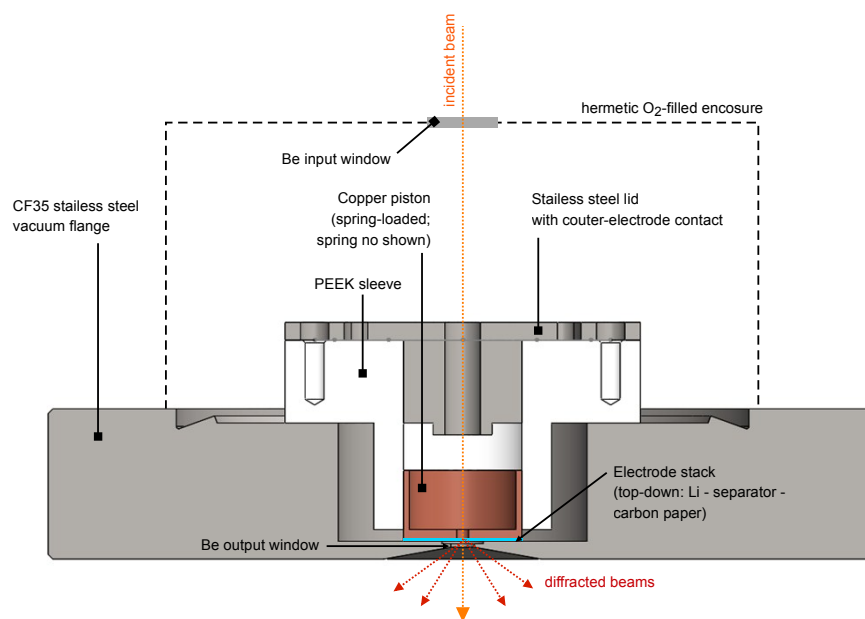

Figure S2. A sketch of the cell used for *operando* XRD studies. Cell construction is similar to used in Ref.<sup>1</sup>.

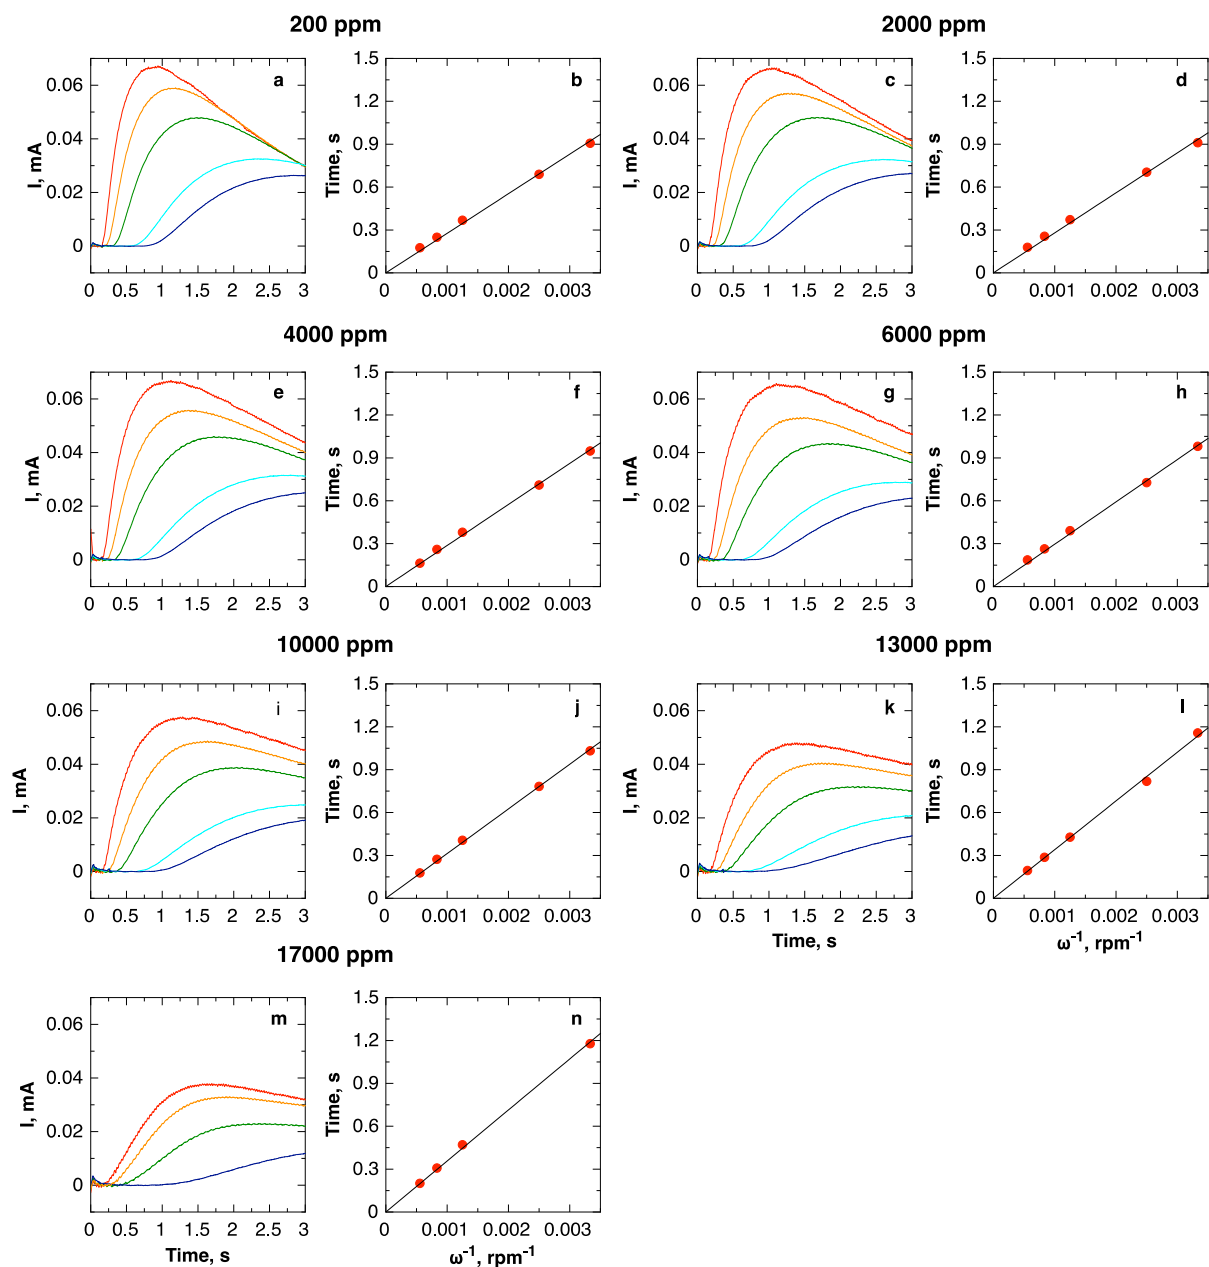

**Figure S3.** Capacitively corrected ring current time transients registered after disk potential step from -0.8 to -1.3 V vs Ag<sup>+</sup>/Ag in electrolyte containing app. 200 (a), 2000 (c), 4000 (e), 6000 (g), 10000 (i), 13000 (k), 17000 (m) ppm of water and corresponding relations between the inverse of rotation speed and transient time (b, d, f, h, i, l, n). Note that fitted lines forced to passed through the origin of the axes (0,0).

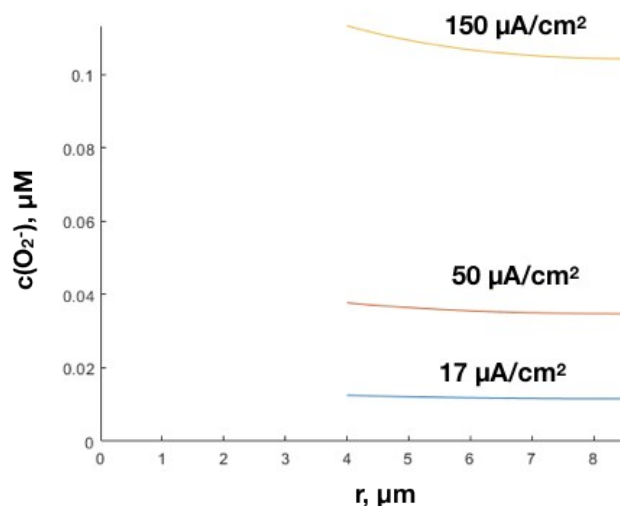

**Figure. S4.** A steady state superoxide concentration profiles around a carbon fiber at discharge current densities: 150, 50 and 17  $\mu\text{A}/\text{cm}^2$  per electrode geometrical area (superoxide to peroxide conversion rate 0.7 1/s).D

### Li<sub>2</sub>O<sub>2</sub> solubility

We used UV-vis spectroscopy of TiO<sub>2</sub><sup>2+</sup> complex with H<sub>2</sub>O<sub>2</sub> formed in the reaction between dissolved Li<sub>2</sub>O<sub>2</sub> and acidic solution of TiOSO<sub>4</sub>.<sup>2,3</sup> For this purpose, we stirred app. 50 mg of Li<sub>2</sub>O<sub>2</sub> in 3 ml of DMSO in glovebox for 1 day. No H<sub>2</sub>O<sub>2</sub> was detected after addition of TiOSO<sub>4</sub> to filtrated DMSO solution. UV-vis adsorption spectra presented in Fig. 3 show no signal both for dry DMSO and containing 3000 ppm water. It should be noted that the H<sub>2</sub>O<sub>2</sub> detection limit in our experiment is  $2.6 \cdot 10^{-5}$  M, which is close to  $2 \cdot 10^{-5}$  M reported in Ref.<sup>2</sup> Therefore, the equilibrium Li<sub>2</sub>O<sub>2</sub> concentration in DMSO with water content less than 3000 ppm is less than  $2.6 \cdot 10^{-5}$  M and beyond the detection limit. It is significantly less than the value of  $4 \cdot 10^{-4}$  M measured by Ren et al. for dry DMSO.<sup>3</sup> For high water content of 15000 ppm the peak positioned at 408 nm and indicating to the formation of [Ti(O<sub>2</sub>)]<sup>2+</sup> appears in spectrum shown in Fig. S5. The corresponding Li<sub>2</sub>O<sub>2</sub> concentration comprises  $6 \cdot 10^{-5}$  M.

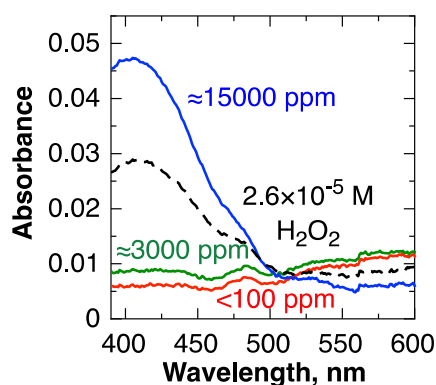

**Figure S5.** UV-vis adsorption spectra of saturated solutions of Li<sub>2</sub>O<sub>2</sub> in DMSO after addition an acidic solution of TiOSO<sub>4</sub>.  $2.6 \cdot 10^{-5}$  M H<sub>2</sub>O<sub>2</sub> in DMSO after addition acidic solution of TiOSO<sub>4</sub> shown as dashed line.

### Estimation of lithium peroxide supersaturation

The diffusion-reaction processes near the flat electrode was modeled numerically to estimate the peroxide concentration that builds up within the above mentioned times. The electrochemical

ORR at the surface is the source of the superoxide specie in the system. Superoxide drains via chemical reaction ( $2O_2^- + 2Li^+ \rightarrow Li_2O_2 + O_2$ ) that at the same time is the source of peroxide. The peroxide drain is absent in this model, as we consider the system evolution before the start of the crystallization process. Such flat electrode model can be described by a simple system of 1-D partial differential equations:

$$\begin{cases} D_1 \frac{d^2 c_1}{dx^2} - kc_1 = 0 \\ D_2 \frac{d^2 c_2}{dx^2} + kc_1/2 = 0 \end{cases}$$

where indexes 1 and 2 represents superoxide and peroxide respectively,  $D$  is diffusion coefficient (both  $D_1$  and  $D_2$  assumed to be  $1.1 \cdot 10^{-6} \text{ cm}^2/\text{s}$  as the latter is unknown),  $k$  is an effective 1<sup>st</sup> order rate constant of superoxide to peroxide chemical conversion,  $x$  – is the distance from the electrode surface.

The boundary conditions are:

$$\left. \frac{dc_1}{dx} \right|_{x=0} = -i/(FD_1); \left. \frac{dc_1}{dx} \right|_{x=+\infty} = 0$$

$$\left. \frac{dc_2}{dx} \right|_{x=0} = 0; \left. \frac{dc_2}{dx} \right|_{x=+\infty} = 0$$

where,  $i$  is current density and  $F$  is Faraday constant.

The peroxide concentration profiles presented in Fig. S6 and time evolution concentration near surface is Fig. 4 in main text for  $k= 24.6 \text{ M/s}$ .<sup>4</sup>

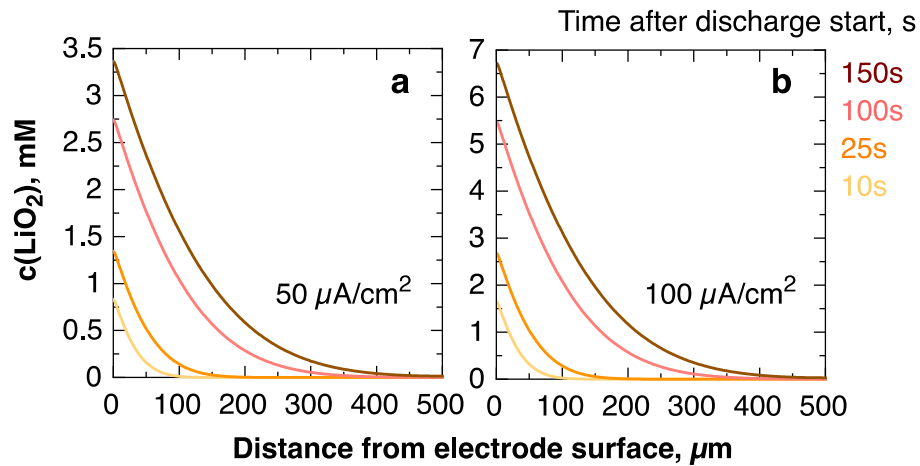

**Figure S6.** Time evolution of solvated peroxide concentration profiles near the flat electrode surface at  $50 \mu\text{A}/\text{cm}^2$  (a) and  $100 \mu\text{A}/\text{cm}^2$  (b)

The peroxide concentration profiles presented in Fig. S7 for  $k= 0.7 \text{ M/s}$ .<sup>5</sup>

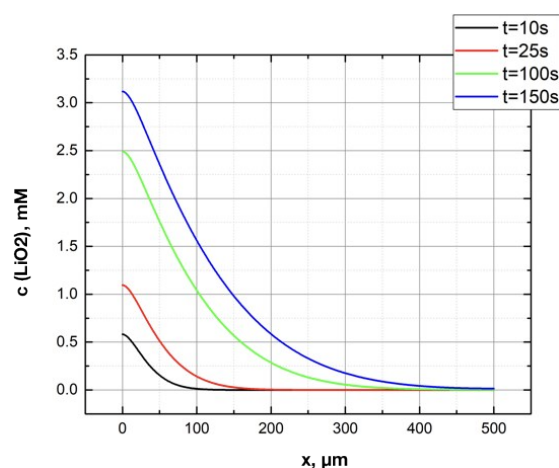

**Figure S7.** Time evolution of solvated peroxide concentration profiles near the flat electrode surface at  $50 \mu\text{A}/\text{cm}^2$ , assuming reaction rate constant  $k = 0.7 \text{ 1/s}$ .

### Experimental conditions for morphology studies

In order to study structural features and shape of the mesocrystals (or partial mesocrystals) first we should adjust proper discharge conditions, which yield large and spatially separated lithium peroxide particles freely grown on carbon fibers or in the nearest environment. Among key parameters defining morphology we can easily vary the depth of discharge and electrolyte humidity. Our choice is illustrated in Fig. S9. For the fixed water content of 3000 ppm the deep discharge (till abrupt voltage drop) results in complete coverage of electrode surface with unavoidable interplay between particles (Fig. S9c). After 70% discharge some of the particles can be distinguished and analyzed in their shape (Fig. S9b), however they are still strongly influenced by environment. For this reason, in our investigation is focused on electrodes discharged up to 20% of full capacity (Fig S9a). The variation of typical morphology of electrodes discharged to 20 % at different water content is presented in Fig. S9d-f. Similar to the previous observation,<sup>2</sup> the mean particle size is strongly dependent on water content. Note that an increase in the water content leads also to a lower population the surface. Therefore, we consider relatively high water content of about 3000 ppm as most suitable for the observation of mesocrystal morphology. Meanwhile at the lower water content (50 and 500 ppm) smaller and more densely packed particles are observed, that makes harder to extract structural information.

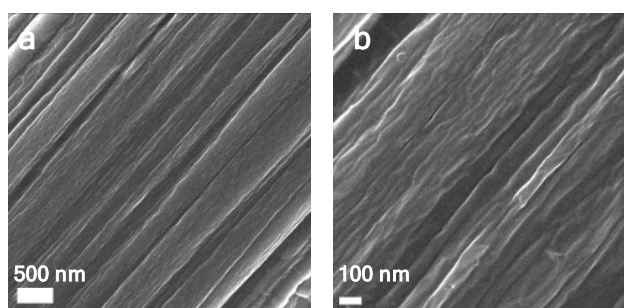

**Figure S8.** SEM image of pristine electrode – carbon paper TGP-H-90– obtained at different magnifications.

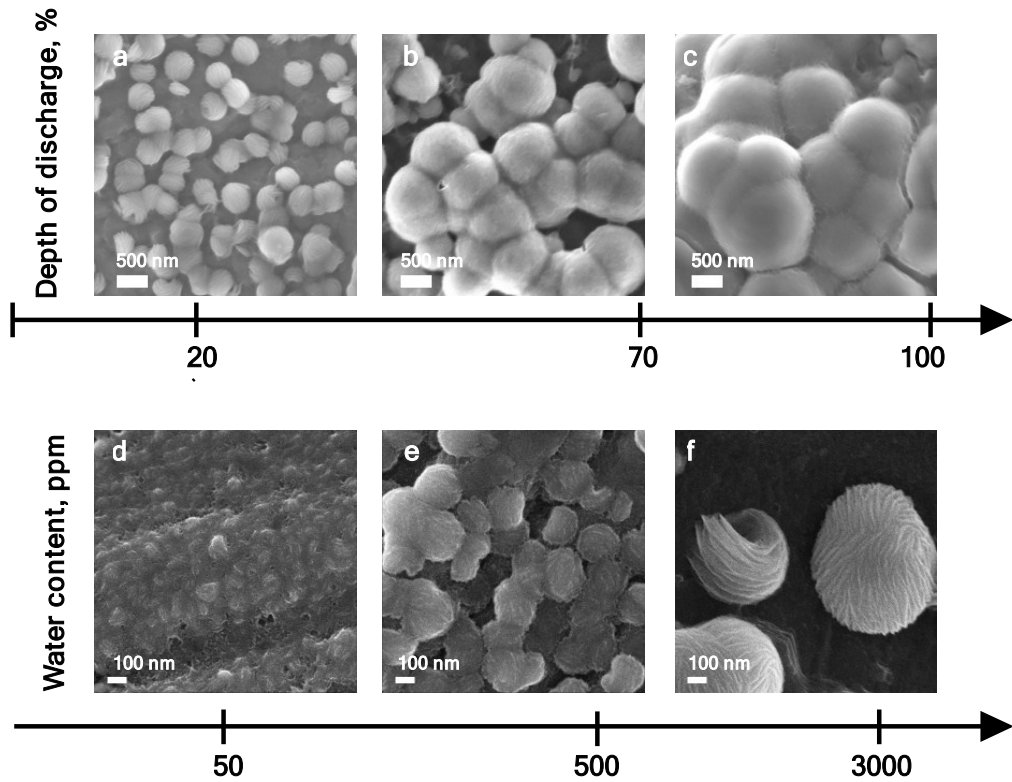

Figure S9. Choice of experimental conditions for morphology studies: a-c) microphotographs obtained for the different discharge depth at water content of 3000ppm H<sub>2</sub>O for 20% discharge; d-e) microphotographs obtained for the different water content in electrolyte for the discharge depth of 20%.

### Calculation fraction of peroxide on electrode surface

Electrode surface A:

$$A = V(1 - \varepsilon) \frac{L'}{S} = V(1 - \varepsilon) \frac{2\pi r}{\pi r^2} = \frac{2V(1 - \varepsilon)}{r}$$

where  $\varepsilon = 0.78$  – electrode porosity,  $L'$  – fiber length,  $S$  – fiber cross-sectional area,  $V$  - electrode volume:

$$V = \frac{\pi h D^2}{4}$$

where  $D = 19.1$  mm – electrode diameter,  $h = 280$   $\mu$ m – electrode thickness

Li<sub>2</sub>O<sub>2</sub> particles on electrode were approximated as hemispheres with diameter ( $d$ ) received from size distribution (Fig. S9 c,d).

Number of particles  $N$ :

$$N = \left( \frac{2\sqrt{A}}{d} \right)^2$$

Li<sub>2</sub>O<sub>2</sub> particle amount –  $v_{part}$ :

$$v_{part} = \frac{m}{M_{Li_2O_2}} = \frac{N \rho_{Li_2O_2} V'}{M_{Li_2O_2}} = \frac{N \rho_{Li_2O_2} \pi d^3}{12 M_{Li_2O_2}}$$

where  $m$  – mass of Li<sub>2</sub>O<sub>2</sub>,  $\rho_{Li_2O_2} = 2.31$  g/cm<sup>3</sup> – Li<sub>2</sub>O<sub>2</sub> density,  $M_{Li_2O_2} = 46$  g/mol – molar mass,  $V'$  - volume of 1 hemisphere.

Amount of  $\text{Li}_2\text{O}_2$  produced during discharge –  $v_{\text{dish}}$ :

$$v_{\text{dish}} = \frac{q}{2F}$$

Where  $q$  – cell capacity,  $F$  – Faraday constant.

Parameters of calculation and results for two cells are listed in table S1.

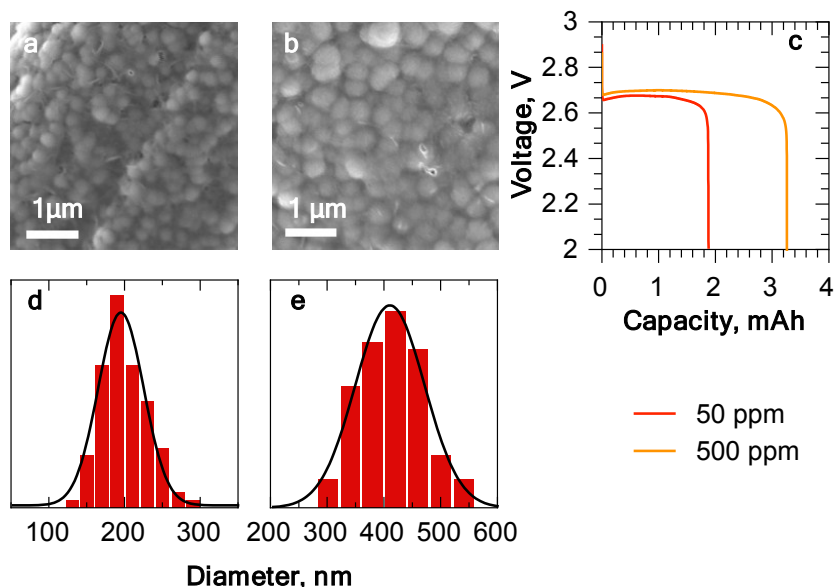

**Figure S10.** Microphotographs of electrode after full cell discharge at  $50 \mu\text{A}/\text{cm}^2$  in 1M LiTFSI in DMSO with water content (a) 50 ppm, (b) 500 ppm water. (c,d) corresponding toroids radial size distribution. (c) discharge curves for these cells.

**Table S1.** Discharge capacity, particle diameter amount of  $\text{Li}_2\text{O}_2$  during discharge and  $\text{Li}_2\text{O}_2$  particles.

| Initial water content, ppm | Discharge capacity (q), mAh | Particle diameter (d), nm | $v_{\text{dish}}$ , $\mu\text{mol}$ | $v_{\text{part}}$ , mol |
|----------------------------|-----------------------------|---------------------------|-------------------------------------|-------------------------|
| 50                         | 1,86                        | 200                       | 3,46                                | 2,49                    |
| 500                        | 3,39                        | 410                       | 6,32                                | 5,12                    |

### Change of X-ray scattering during nucleation

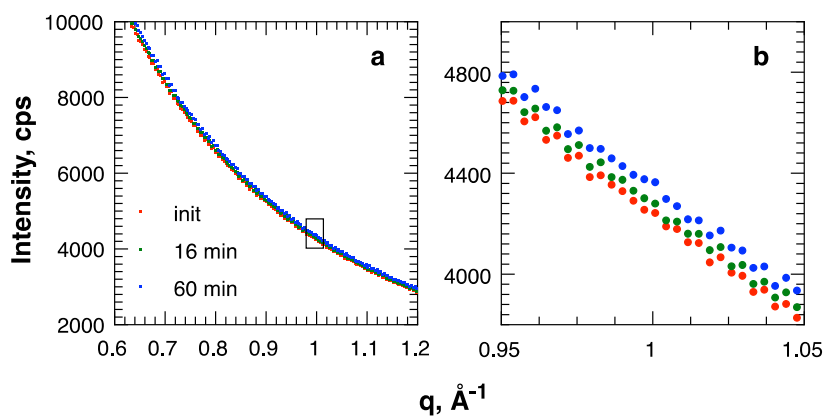

**Figure S11.** Initial SAXS curve (a) and after corresponding discharge steps (b) for electrochemical cell discharged at  $200 \mu\text{A}$ . Electrode material – carbon fiber paper Toray TGP-H-90



**Table S2.** SLD<sup>7</sup> and density of compounds and density used in this work.

| Compound                                | $\rho$ , g/cm <sup>3</sup> | SLD $\times 10^5$ , Å <sup>-2</sup> |
|-----------------------------------------|----------------------------|-------------------------------------|
| C                                       | 2.36                       | 1,87                                |
| DMSO (C <sub>2</sub> H <sub>6</sub> SO) | 2.2                        | 1,01                                |
| Li <sub>2</sub> O <sub>2</sub>          | 1.1                        | 1,93                                |

**Table S3.**  $\Delta\rho^2$  for various interfaces.

| Compound 1 | Compound 2                     | $\Delta\rho^2 \times 10^{11}$ , Å <sup>-4</sup> |
|------------|--------------------------------|-------------------------------------------------|
| C          | DMSO                           | 7,35                                            |
| C          | Li <sub>2</sub> O <sub>2</sub> | 0,03                                            |
| DMSO       | Li <sub>2</sub> O <sub>2</sub> | 8,39                                            |

Electrode scattering intensity before discharge  $I_{init}$ :<sup>6</sup>

$$I_{init} \sim \Delta\rho^2 S_{fX}$$

where  $S_{fX}$  – electrode surface illuminated by X-rays (spot size  $d_x = 1$  mm)

$$S_{fX} = \frac{\pi h d_x^2 (1 - \varepsilon)}{2r}$$

Scattering intensity after formation of nucleus  $I_{nucl}$ :

$$I_{nucl} \sim \Delta\rho^2 (S_{fX} + S_{nucl})$$

where  $S_{nucl}$  – surface of all nucleus. Since  $\Delta\rho^2$  for C – DMSO and Li<sub>2</sub>O<sub>2</sub> – DMSO are close:

$$\frac{I_{nucl}}{I_{init}} = \frac{S_{fX} + S_{nucl}}{S_{fX}}$$

$$S_{nucl} = S_{fX} \left( \frac{I_{nucl}}{I_{init}} - 1 \right)$$

Number of nucleus –  $N_{nucl}$ :

$$N_{nucl} = \frac{S_{nucl}}{S^*} = \frac{4S_{nucl}}{\pi d^*{}^2}$$

where  $S^*$  — surface of one nuclei and  $d^* = 3$  nm – its diameter.

Nucleus concentration —  $c_{nucl}$ :

$$c_{nucl} = \frac{N_{nucl}}{V_{eX}} = \frac{4N_{nucl}}{\varepsilon \pi d_x^2 h} = 5 \times 10^{14} \text{ particle/cm}^3$$

where  $V_{eX}$  — electrolyte volume illuminated by X-rays.

Distance between nucleus –  $l_{nucl}$ :

$$l_{nucl} = c_{nucl}^{-\frac{1}{3}}$$

Amount of  $\text{LiO}_2$  ( $v_{\text{LiO}_2}^*$ ) in volume for 1 nuclei –  $V_{\text{nuc1}}$ :

$$v_{\text{LiO}_2}^* = c_{\text{LiO}_2} \times V_{\text{nuc1}} = c_{\text{LiO}_2} \times l_{\text{nuc1}}^3 = 5 \times 10^{-21} \text{ mol}$$

Amount of  $\text{Li}_2\text{O}_2$  ( $v_{\text{Li}_2\text{O}_2}^*$ ) in 1 nuclei:

$$v_{\text{Li}_2\text{O}_2}^* = \frac{m^*}{M_{\text{Li}_2\text{O}_2}} = \frac{\pi d^3 \rho_{\text{Li}_2\text{O}_2}}{6M_{\text{Li}_2\text{O}_2}} = 7 \times 10^{-22} \text{ mol}$$

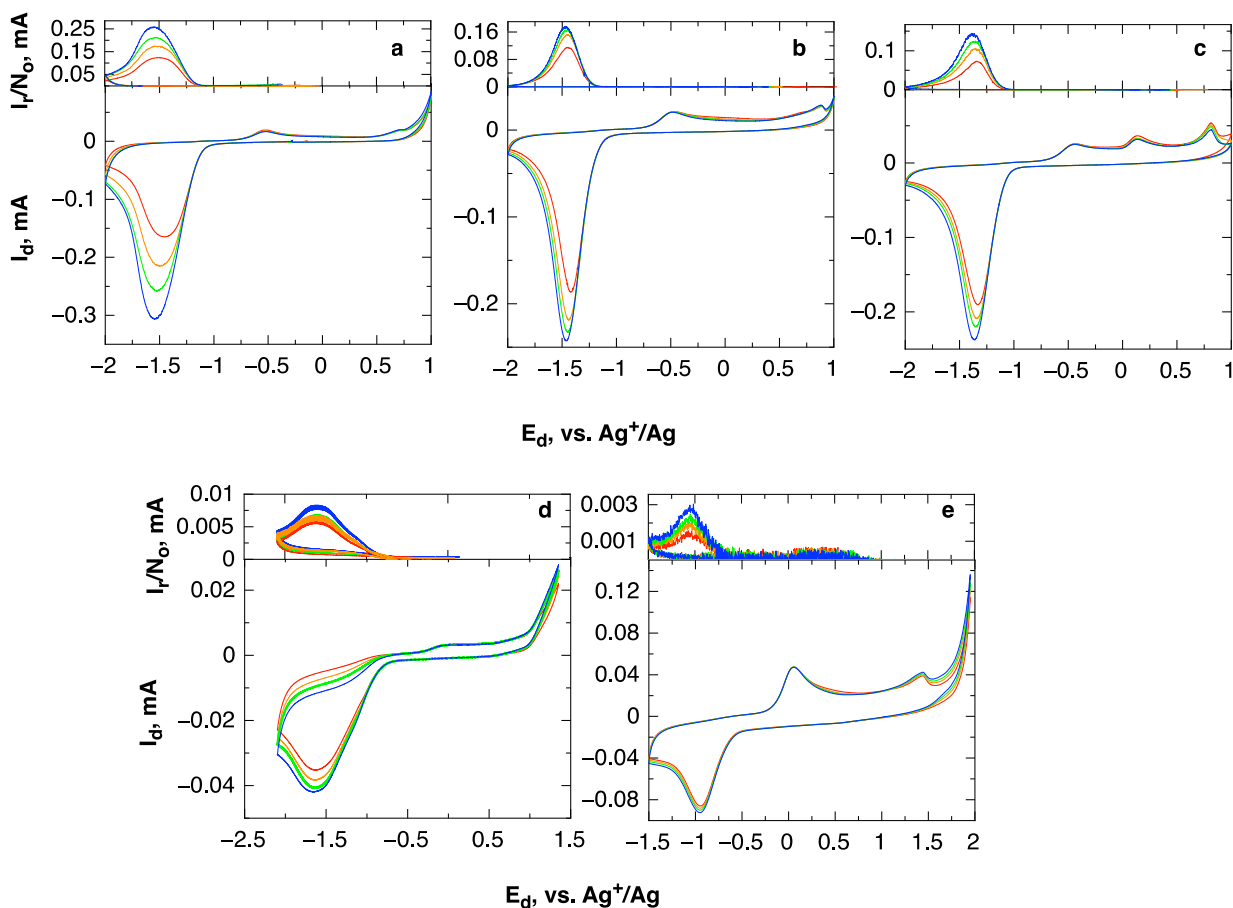

**Figure S12.** Cyclic voltammety for GC disk/ Pt ring at 50 mV/s in  $\text{O}_2$  saturated 0.1 M  $\text{LiClO}_4$  in DMSO (a), DMA(b), DMF (c), TEGDME (d), MeCN (e). Rotation speed 1800 rpm.

- (1) Itkis, D. M.; Krivchenko, V. A.; Kozmenkova, A. Y.; Pakhotina, M. S.; Napolskiy, F. S.; Gigli, L.; Plaisier, J.; Khasanova, N. R.; Antipov, E. V. Extended Limits of Reversible Electrochemical Lithiation of Crystalline  $\text{V}_2\text{O}_5$ . *CHEMELECTROCHEM* **2019**, *6*, 2013–2019.
- (2) Schwenke, K. U.; Metzger, M.; Restle, T.; Piana, M.; Gasteiger, H. A. The Influence of Water and Protons on  $\text{Li}_2\text{O}_2$  Crystal Growth in Aprotic Li- $\text{O}_2$  Cells. *J. Electrochem. Soc.* **2015**, *162*, A573–A584.
- (3) Ren, J.; Huang, Z.; Kalambate, P. K.; Shen, Y.; Huang, Y. Rotating-Disk Electrode Analysis of the Oxidation Behavior of Dissolved  $\text{Li}_2\text{O}_2$  In Li- $\text{O}_2$  Batteries. *RSC Adv.* **2018**, *8*, 28496–28502.
- (4) Zhang, Y.; Zhang, X.; Wang, J.; McKee, W. C.; Xu, Y.; Peng, Z. Potential-Dependent Generation of  $\text{O}_2^-$  And  $\text{LiO}_2$  And Their Critical Roles in  $\text{O}_2$  Reduction to  $\text{Li}_2\text{O}_2$  In Aprotic Li- $\text{O}_2$  Batteries. *J. Phys. Chem. C* **2016**, *120*, 3690–3698.

- (5) Johnson, L.; Li, C.; Liu, Z.; Chen, Y.; Freunberger, S. A.; Ashok, P. C.; Praveen, B. B.; Dholakia, K.; Tarascon, J.-M.; Bruce, P. G. The Role of LiO<sub>2</sub> Solubility in O<sub>2</sub> Reduction in Aprotic Solvents and Its Consequences for Li-O<sub>2</sub> Batteries. *Nature Chemistry* **2014**, *6*, 1091–1099.
- (6) Feigin, L. A.; Svergun, D. I. Structure Analysis by Small-Angle X-Ray and Neutron Scattering. **1987**.
- (7) SLD Calculator <https://sld-calculator.appspot.com> (accessed 28 November 2019)
